# Supplementary material
Source: HighWire-hosted journal article supplement (https://emj.bmj.com/content/33/8/562)
Supplement: inline-supplementary-material-2 [file inline-supplementary-material-2.pdf]

## Supplementary appendix 2

### Appendix – The Survey text

1. Have you completed your training on the LUCAS-2 device?

*Yes*

*No*

2. How easy was the device to learn to use?

*Very easy*

*Easy*

*Difficult*

*Very difficult*

3. Prior to the trial had you heard of, or used, any type of mechanical chest compression device?

*Heard of*

*Used*

4. What, in your opinion, are the advantages of using the device?

*Quality of chest compressions*

*Safety of crew in rear of vehicle*

*Consistency of chest compressions*

*Being able to give chest compressions when transferring patient down stairs*

*Being able to give chest compressions in the back of a moving vehicle*

*Helps with patient moving and handling*

5. What, in your opinion, are the disadvantages of using the device?

*Too heavy to take in to patient's location*

*Too noisy*

*Too brutal looking*

*Hospitals don't like it*

*Unable to take patients down stairs with device attached*

*Device is too efficient*

6. Would you like to see this piece of equipment introduced into the Trust?

Yes

No

7. Have you used the LUCAS-2 device in clinical practice?

Yes

No

8. How many times have you either used or seen the device used in practice?

*Zero*

*Once*

*Twice*

*Three times*

*More than three times*

9. How important do you think it is for the Trust to be involved in clinical research?

*Very important*

*Quite important*

*Not important*

*I don't think the Trust should be involved in research*

10. Have you been trained on the PARAMEDIC trial protocol?

Yes

No

11. How easy was the protocol to understand?

*Very easy*

*Easy*

*Difficult*

*Very difficult*

12. How easy was the protocol to remember in practice?

*Very easy*

*Easy*

*Difficult*

*Very difficult*

13. What was good about being involved in the trial?

*Using a new piece of kit*

*Not having to complete a separate form for data collection*

*Contributing to knowledge for the profession*

*It made cardiac arrest management easier*

*My patients' chances of survival were improved*

*It gave me a CPD opportunity*

*None of the above*

14. What was problematic about being involved in the trial?

*Having to remember to text the clinical fellow after each cardiac arrest incident*

*Having an extra piece of equipment to carry around*

*Having an additional procedure to remember at a cardiac arrest incident*

*Trying to remember how to use the device*

*Trying to remember the trial protocol*

*None of the above*
